# Supplementary material
Source: PubMed Central journal article supplement (PMC3961635)
Supplement: supp_M113.535765_jbc.M113.535765-1.pdf [file supp_M113.535765_jbc.M113.535765-1.pdf]

**SUPPLEMENTAL FIGURE LEGENDS****Figure S1. IL-4 potently induces luciferase expression in THP-1 cell clones stably transfected with a MRC1 promoter-driven luciferase construct.**

A) Expression constructs with MRC1 promoter-driven luciferase activity used for generating THP-1 cell clones stably expressing these constructs. The MRC1 promoter lies within 1.0kb upstream of the MRC1 start codon. B) Luciferase activity of a THP-1 cell clone stably transfected with a 1.0kb MRC1-promoter luciferase construct. IL-4 or IL-13 induce M2-type macrophage polarization, reflected by the increased MRC1-luciferase activity (>5-fold). Increasing the dose from 20 to 40ng/ml or combining IL-4 and IL-13 does not further increase luciferase activity. C) IL-4 treatment of PMA primed THP-1 cells, induces luciferase activity, consistent with M2-type macrophage polarization (M2). IL-4-induced M2-type polarized macrophages can be repolarized to the M1-type by replacing IL-4 with IFN- $\gamma$ +LPS. After PMA treatment (100nM, for 24 hours), cells were treated with IL-4 (20ng/ml) for 2 days and changed to fresh medium for 2 days (M2); M2→M1:IL-4 treatment for 2 days and then change to IFN- $\gamma$  (20ng/ml) + LPS (10ng/ml) for another 2 days; M1: IFN- $\gamma$  + LPS for 2 days and then change to fresh medium for 2 days; “M1→M2”: IFN- $\gamma$  + LPS for 2 days and then IL-4 for 2 days. D) After priming with PMA, endogenous MRC1 proteins were further induced with IL-4 (20ng/ml) treatment, while the addition of LPS (10ng/ml) and IFN- $\gamma$  (20ng/ml) inhibited MRC1 protein levels. Densitometric band values are indicated. \*\*:  $p<0.01$ . \*\*\*:  $p<0.001$

**Figure S2. Concentrations of doxycycline that are sufficient to inhibit M2-type polarization of macrophages do not affect cell viability.**

BMDM cells isolated from 3-4 months old male C57Bl/6j mice were pretreated with Dox overnight and subsequently treated with Dox +/- IL-4 (20ng/ml) in DMEM+1% FBS+M-CSF for 3 days. Cells were stained with Live/Dead cell viability kit (Invitrogen) and assessed by a FACSCanto flow cytometer.

**SUPPLEMENTAL TABLES****Table S1. Primers used to amplify genomic DNA containing the MRC1 promoter.**

|                                                 |                             |
|-------------------------------------------------|-----------------------------|
| MRC1 2.5 kb (between -2383 to +116 bp), forward | ggggtaccTAGGCTACGCTGAGCCGT  |
| MRC1 1.5 kb (between -1383 to +116 bp), forward | ggggtaccTTCCCTCCGGTCAGGATA  |
| MRC1 1.0 kb (between -883 to +116 bp), forward  | ggggtaccCCTGACTCACTGTA ACTT |
| MRC1, reverse                                   | ccgctcgagGGCCCAGGGTTTATCCTT |

**Table S2. Semiquantitative RT-PCR primers used.**

| <b>Human</b> |         |                               |  |
|--------------|---------|-------------------------------|--|
| h36B4        | for     | GCAATGTTGCCAGTGTCTGT          |  |
|              | rev     | GCCTTGACCTTTTCAGCAAG          |  |
| hCD68        | for     | GCTACATGGCGGTGGAGTACAA        |  |
|              | rev     | ATGATGAGAGGCAGCAAGATGG        |  |
| hMRC1        | for     | TGGTTTCCATTGAAAGTGCTGC        |  |
|              | rev     | TTCCTGGGCTTGACTGACTGTTA       |  |
| hCXCL9       | for     | TTGGGCATCATCTTGCTGGTTCT       |  |
|              | rev     | TGGCTGACCTGTTTCTCCCACT        |  |
| hCox-2       | for     | CCGGGTACAATCGCACTTA           |  |
|              | rev     | GGCGCTCAGCCATACAG             |  |
| hCD11b       | for     | CAGACAGGAAGTAGCAGCTCCT        |  |
|              | rev     | CTGGTCATGTTGATGAAGGTGCT       |  |
| <b>Mouse</b> |         |                               |  |
| m36B4        | for     | TCACTGTGCCAGCTCAGAAC          |  |
|              | rev     | AATTTCAATGGTGCCTCTGG          |  |
| mCD115       | for     | ATCTGTTCCCGTCCTCACAG          |  |
|              | reverse | ACTGCCATTGCTCACACATC          |  |
| mF4/80       | for     | GCCTATTATCTATACCCTCCAGCACATC  |  |
|              | rev     | TCCATCTCCCATCCTCCACATCAG      |  |
| mCD68        | for     | AGCTGCCTGACAAGGGACT           |  |
|              | rev     | AGGAGGACCAGGCCAATGAT          |  |
| mCox-2       | for     | TGAGTACCGCAAACGCTTCTC         |  |
|              | rev     | TGGACGAGGTTTTTCCACCAG         |  |
| miNOS        | for     | AACGGAGAACGTTGGATTTG          |  |
|              | rev     | CAGCACAAGGGGTTTTCTTC          |  |
| mCxcl9       | for     | TTTTGGGCATCATCTTCTGG          |  |
|              | rev     | GAGGTCTTTGAGGGATTTGTAGTGG     |  |
| mArg1        | for     | TGAGAGACCACGGGGACCTG          |  |
|              | rev     | GCACCACACTGACTCTTCCATTC       |  |
| mIL-1Ra      | for     | TTACAAGGACCAAATATCAAACCTAGAAG |  |
|              | rev     | GGATGCCCAAGAACACACTATG        |  |
| mFizz1       | for     | TCCCAGTGAATACTGATGAGA         |  |
|              | rev     | CCACTCTGGATCTCCCAAGA          |  |
| mCcl17       | for     | CCCATGAAGACCTTCACCTC          |  |
|              | rev     | CATCCCTGGAACACTCCACT          |  |
| mCcl22       | for     | TGGCTCTCGTCCTTCTTGCT          |  |
|              | rev     | AGGCTTGCGGCAGGATT             |  |
| mCD11b       | for     | AAACCACAGTCCCGCAGAGA          |  |
|              | rev     | CGTGTTCAACAGCTGGCTTA          |  |
| mIL-1b       | for     | TGATGAGAHCATCCAGCTTC          |  |
|              | rev     | CATGAGTCACAGAGGATGGG          |  |

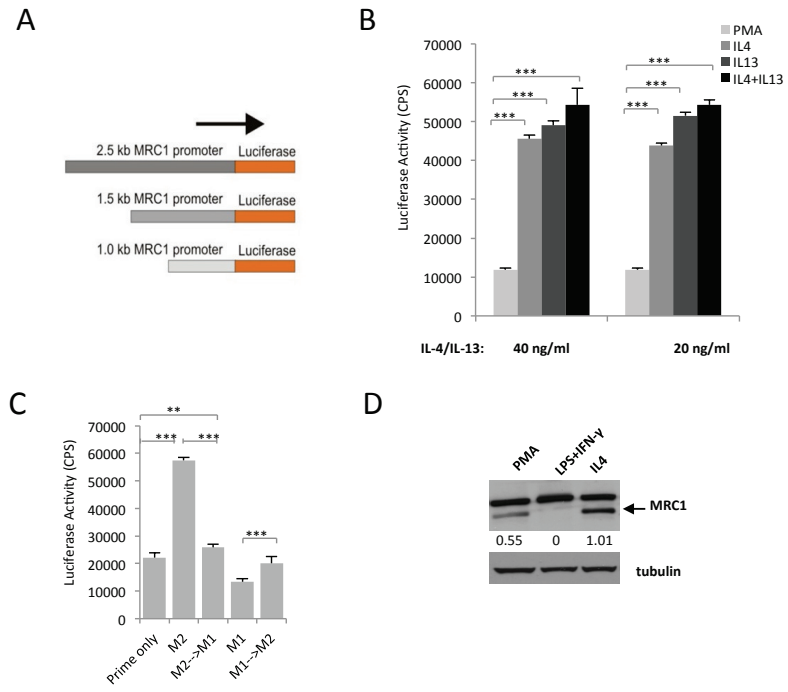

Figure S1

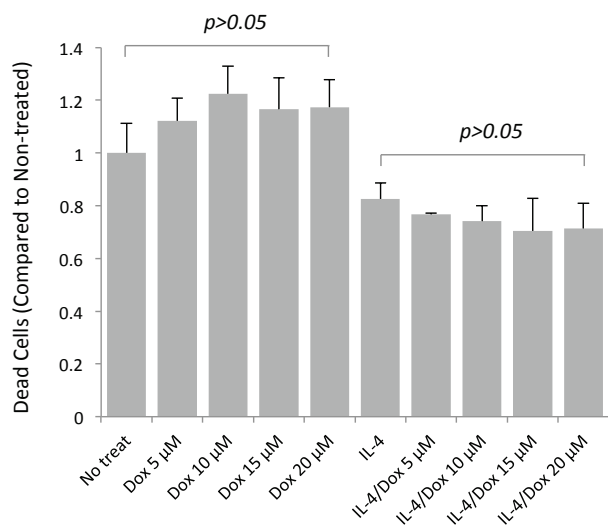

Figure S2
